# Supplementary material
Source: PubMed Central journal article supplement (PMC5301997)
Supplement: NIHMS832549-supplement-1.pdf [file NIHMS832549-supplement-1.pdf]

# Supplemental Data File S1: Supplemental vector sequences, related to Experimental Procedures.

## A) AVA2590[Launchpad, Puromycin<sup>R</sup>]:

pSV40 promoter: 2525-2863

FRT1: 2871-2919

BGHpA: 2929-3149

GFP: 3152-3872

EF1alfa promoter: 3873-5381

PGK-PuroR: 5382-6516

FRT2: 6520-6567

gtggcccgagagctgcatccggagtagatctagatggagttccgcggttacataaacttacggtaaatggcccgctggctgaccgcccacg  
acccccgccattgacgtcaataatgactgatgttcccatagtaacgccaatagggactttccattgacgctaattgggagtttgtttt  
gcacccaaatcaacgggactttccaaaatgtcgttaataaccccgcccggtgacgcaaatggcggttaggcgtgactctagaaggct  
atataagcagagctcgttttagtgaaccggtttataactacttctctggttctctctggttagaccagatctgagcctgggagctctctggct  
aactagggaaaccactgcttaagcctcaataaagccttgcccttgagtgtctcaaagtagtgtgtgcccgtctggtgtgtgactctggtaac  
tagagatccctcagacccttttagtcagtggtgaaatctctagcagtgccgcccgaacagggacttgaaagcgaagtaaaagccagag  
gagatctctcgacgcaggactcggcttgctgaagcgcgcacggcaagagggcgagggggcgccgactggtgagtagcgcacccaaatctgac  
tagcggaggctagaaggagagatgggtgtagagagctcgggtattaaagcgggggagaattagataaaatgggaaaaaattcgggttaagg  
ccagggggaagaaacaataaaactaaaacatagtagtgggcaagcagggagctagaacgattcgcagttaatcctggccttttaga  
gacatcagaaggctgtagacaaactgggacagctacaacctccctcagacaggatcagaagaacttagatcattatataataca  
tagcagtcctctattgtgtgcatcaaaggatagatgtaaaagacaccaaggaagccttagataagatagaggaagagcaaaacaaaagt  
aagaaaaaggcacagcaagcagcagctgacacaggaaacaacagccaggtcagccaaaattaccctatagtgagaacctccaggggca  
aatggtacatcaggccatcacctagaactttaaatgcatgggtaaaagtagtagaagagaaggctttcagcccagaagtaataccca  
tgttttcagcattatcagaaggagccaccccaagatttaataacatgctaaacacagtggggggacatcaagcagccatgcaaatg  
ttaaagagaccatcaatgaggaagctgcagaatgggatagattgcatccagtgcatgcagggcctattgaccagggccagatgagaga  
accaaggggaagtgcacatagcaggaactactagcaaatagagaacaatttggaataataaaacaataatctttaagcaatcctcag  
gaggggaccagaaattgtaacgcacagtttaattgtggaggggaatttttctactgtaattcaacacaactgtttaatagtagtctgg  
tttaatagtagtctggagtagtgaagggtaacataacactgaaggaagtgcacacatcacactcccatgcagaataaaacaatttataaa  
catgtggcaggaagttaggaaaagcaatgtatgcccctcccatcagtggaacaaattagatgttcatcaaatattactgggctgctattaa  
caagagatggtggttaataacaacaatgggtccgagatcttcagacctggaggaggcgatagtaggggacaattgggagaagtgaattatat  
aaatataaagtagtaaaaattgaaccattaggagtagcaccaccaaggcaagagagaagagtggtgcagagagaaaaagagcagtggg  
aataggagctttgttccctgggttcttggggagcagcaggaagcactatgggagcagcaggtcaatgacgctgacggtacagggccagacaat  
tattgtctgatatagtgacgagcagaacaatttgcctgagggctattgagggcgaacagcactctggtgcaactcacagctctggggcact  
aaacagctccagggcaagaatcctggctgtggaaagatacctaaaggatcaacagctcctggggatttgggggttgcctggaaaactcat  
ttgcaccactgctgtgccttggatgtctagttggagtaataaactctggaacagatttgggaataacatgacctggtgagtagtgaggaca  
gagaaattaacaattacacaagcttaatacactccttaattgaaagatcgcaaaaccagcaaaaagaatgaacaagaattattggaa  
ttagataaatgggcttgcggcgggaattcacaatggcagtagtccacaattttaaaagaaaaggggggattggggggtacagtg  
aggggaaagaatagtagacataatagcaacagacatacaaaactaaagaattcaaaaaacaatta~~ca~~aaaattcaaaattttcgggtt  
attacagggacagcagagatccactttggg~~gcgggcCGCGGAGGCAGCTGTGGAATGTGTGTCAGTTAGGGTGTGGAAAGTCCCAGGCT~~  
~~CCCAGCAGGCAGAAGTATGCAAAGCATGCATCTCAATTAGTCAGCAACCAGGTGTGGAAAGTCCCAGGCTCCCAGCAGGCAGAAGT~~  
~~ATGCAAAGCATGCATCTCAATTAGTCAGCAACCATAGTCCCGCCCCTAACTCCGCCCATCCCGCCCCTAACTCCGCCCAGTTCGCCCA~~  
~~TTCTCCGCCCATGGCTGACTAATTTTTTTTTTATTTATGCAAGGCCGAGGCCGCTCGGCCTCTGAGCTATTCCAGAAGTAGTGAGGAG~~  
~~GCTTTTTTGGAGGCT~~TACC~~ATG~~GAGAAGTT~~CT~~TATTCCGAAGTT~~CT~~TATTC~~CT~~TAGAAAGTATAGGAAC~~TT~~CAAGCTT~~GGT~~CGACCTCT  
TAAGTACCACATTTGTAGAGGTTTTACTTGGCTTTAAAAAACCTCCCACACCTCCCCCTGAACCTGAAACATAAAATGAATGCAATTGTT  
GTTGTTAACTTGTATTGTCAGCTTATAATGGTTACAAATAAAGCAATAGCATCACAAATTTACAAATAAAGCATTTTTTTTCACTGCA  
TTCTAGTTGTGGTTTTGTCCAAAC~~TCAT~~CGAG~~CTCGA~~cttactgtacagctcgtccatgcccagagagtgatcccggcggcggtcacgaac  
tccagcaggaccatgtgatcgcgcttctcgttggggcttttgcctcagggcggactgggtgctcaggttagtggttgcgggcagcagcac  
ggggcgcgctcgcgatgggggtgttctgctggtagtggtcggcgagctgcacgctgcccgtcctcgatggttgtggcggatccttgaagttca  
ccttgatgcccgttcttctgcttgcggccatgatataagcgttgtggctgttgtagttgtactccagcttgtgcccaggatggttgcg  
tctccttgaagtcgatgcccctcagctcgatgcccgttaccagggtgtgcgcctcgaacttcacctcggcgccgggtcttgtagttgccc  
gtcgtccttgaagaagatgggtgcgctcctggacgttagcctcggggcactggcggacttgaagaagtcgctgctgctcaatgtgtgggtcggggt  
agcggctgaagcactgcacgcgcttaggtcaggggtcagcaggggtggggcagggcagggcagcttgcgggtggtgcagatgaactc  
agggctcagcttgcgtaggtggcactgcgccctgcgccctgcggcagcagctgaaacttgtggcggcttacgtgcccgtttacgtcgcgctccagctcgaccag  
gatggggcaccaccccggtgaacagctcctcgccttgcctca~~cat~~gtggactagttctagagcggaaacgctagagttttcacgcac  
ctgaaatggaagaaaaaaactttgaaccactgtctgaggcttgagaatgaaccaagatccaaactcaaaaagggcaaatccaaggaga  
attacatcaagtccaagctggcctaacttcagctcaccaccactcagtggtgggaaactccatcgcataaaaaccctcccccaacct  
aaagacgactactcaaaagctcgagaactaatcgaggtgctggacggcgcccggctactccgtggagtcacatgaagcgcagcgtgga  
ggacggaaagcccttttcttgggtgactcaccgcccgcctctcccagagcgcgctcctccattttgagctcctgacgag  
ggccgggaagcggccatctttccgctcacgcaactgggtgcccagccgggcccagcct~~ct~~tgccgcccagggcggggcgatacacggcggcg  
cgaggccagggcaccagagcagggcggccagcttgagactacccccgtccgattctcgggtggcgcgctcgcagggccccgcctcgcgca



aatattattgaagcatttatcagggttattgtctcatgagcggatacatatattgaatgtatttagaaaaataaacaataggggtccg  
cgcacatttccccgaaaagtgccacctgacgtctaagaaaccattattatcatgacattaacctataaaaaataggcgtatcacgaggcc  
ctttcgtcttcaagaactgcctcgcgcgtttcgggtgatgacgggtgaaaacctctgacacatgcagctcccggagacgggtcacagcttgt  
ctgtaagcgggatgccgggagcagacaagcccgtcagggcgcgtcagcgggtgttggcgggtgtcggggcgcagccatgacctcagtcacg  
tagcgatagcggagtgtactggcttaactatgcggcatcagagcagattgtactgagagtgcacatatgcgggtgtgaaataccgcaca  
gatgcgtaaggagaaaaataccgcatcaggcgccattcgccattcaggctgcgcaactgttgggaagggcgatcgggtgcgggcctcttcg  
ctattacgccagcgcggggaggcagagattgcagtaagctgagatcgcagcactgcactccagcctgggagcagagtaagactctgtc  
tcaaaaaataaaataaaataaatcaatcagatattccaatcttttcttttatttatttatttatttctattttggaaacacagtccttcc  
ttattccagaattacacatatattctatttttctttatgatgctccagtttttttagaccttcacctgaaatgtgtgtatacaaaatct  
aggccagtcagcagagcctaaaggtaaaaaataaaataaaaaataaaataaaatctagctcactccttcacatcaaaatggagata  
cagctgttagcattaaataccaaataacccatcttgcctcaataattttaagcgcctctctccaccacatctaactcctgtcaaaggc  
atgtgccccttcggggcgtctgctgtgctgccaaccaactggcatgtggactctgcaggggtccctaactgccaagccccacagtgctgc  
cctgaggctgccccttcttctagcggctgccccactcggctttgctttccctagtttcagttacttgcttcagccaaggtctgaaa  
ctaggtgcgcacagagcggtaagactgagagagaaagagaccagctttacaggggtttatcacagtgcaccctgacagtcgctcagcct  
cacagggggtttatcacattgcaccctgacagtcgctcagcctcacagggggtttatcacagtgcacccttacaatcattccatttgatt  
cacaatttttttagtctctactgtgcctaacttgtaagttaaatttgatcagaggtgtgttcccagaggggaaaaacagtatatacaggg  
ttcagtactatcgcatttcagg

**B) AVA2515[RFP(PTC-), Hygromycin<sup>R</sup>]:**

**tDNA1: 1045-1141**

**EF1alfa promoter: 1176-2679**

**5xtmTomato: 2702-9994**

**TEV protease: 9995-10720**

**PEST (degradation sequence): 10748-10882**

**Human beta-globin( $\Delta$ I1): 10889-12271**

**BGH polyA: 12293-12517**

**tDNA2: 12803-12899**

**FRT: 12910-12957**

**HygromycinR (lacks promoter and 1<sup>st</sup> Methionine): 12977-14253**

acttcatttttaatttaaaaggatctaggtgaagatccttttttgataatctcatgacccaaaatcccttaacgtgagtttctggtccact  
gagcgtcagaccctgtagaaaagatcaaaggatcttcttgagatccttttttctgcgcgtaatctgctgcttgcaacaaaaaacca  
ccgctaccagcgggtggtttgtttgcccgatcaagagctaccaactcctttttccgaaggtaactggcttcagcagagcgcagataccaaa  
tactgtccttctagtgtagccgtagtttagggcaccacttcaagaactctgtagcaccgcctacatacctcgctctgctaactcctggttac  
cagtggtgctgctgccagtgccgataaagtcgtgtcttaccggggttggaactcaagacgatatgttaccggataagggcgcagcgggtcgggctga  
acgggggggttcgtgcaacacagcccagcttgaggcgaacgacctacccgaactgagatacctacagcgtgagctatgagaaagcggcac  
gcttcccgaagggagaaaagggcagcaggtatccggtaagcggcagggctcggaacaggagagcgcacaggggagcttccagggggaaacg  
cctggtatcctttatagtcctgctcgggtttcgccacctgacttgagcgtcgatttttggatgctcgtcagggggcggagcctatgg  
aaaaacgccagcaacgcggcctttttacgggttcctggccttttgccttttgcctacatgttcttttctgcttatccccgatctc  
tgtggataaccgtattaccgctttgagtgagctgataccgctcgcgcgagccgaacgacccgagcgcagcagctcagtgagcaggaag  
cgggaagagcgcaccaatacgcacaaaccgctctccccgcgcttgccgattcattaatgcagctggcagcagaggtttcccactgga  
gccccagtgagcgcacacgaattaatgtgagttagctcactcattagccacccaggcACGCGAagcgttggttggttttagtgcccg  
gtttcgaaccggggacctttcgcgtgttagggcaacgtgataaccactacactacggaaaccaacgggtgctagACGCGTattgtctatt  
ctgactcggatcCGTACGaatctctatgtttgacagcttatacatgattagctttggagcgaagccagcaatggtagaggggaagattct  
gcacgtcccttcaggcggcctccccgtcaccaccccccaaccgcggcggagctgagagtaattcaatacaaaaggactcggc  
cctgccttggggaaaccagggaacgctcgttaaactcccactaacgtagaaccagagatcgtcgcgttcccgcctccaccgcggc  
ctctcgtcatcactgaggtggagaagagcatgcgtgaggtccgggtgcccgtcagtgggcagagcgcacatcgcccacagtcctccgaga  
agttggggggaggggtcggcaattgaaccgggtgcctagagaaagtggcgcggggtaaactgggaaagtgatgtcgtgtactggctccgc  
ctttttcccaggggtgggggagaaaccgtatataaagtgcagtagtcgcctgaaacgttctttttcgcacagggtttgcccagaaacaca  
ggtaagtgcctgtgtgtggttcccgcgggctggcctctttacgggttatggccttgcgtgcttgaattacttccacgccccggctg  
cagtagctgattcttgatcccagacttccgggttggaaagtgggtgggagagttcgaggccttgcgcttaaggagcccccttgcctcgtgc  
ttgagttgaggcctggcctgggctgctggggcgcgcgctgcaatctgggtggcacttgcgcctgtctcgtcgttctcgataagctct  
tagccatttaaaattttgatgacctgctgcgacgctttttttctggcaaga tagtctgtaaagcggggcaagaatgcacactgggt  
atctcgggttttggggcgcggggcggcgaacggggcggcctgctcccagcgcacatgttccggcagggcgggctgcgagcggccacc  
gagaaacgggagggggtagtctcaagctggcggcctgctctgggtgcttgcctcgcgcgcgctgtaacgcctccgcccctggggcggc  
caggctggcccggctggcaccagttgctgagcggaaagatggcgccttcccgcctgctgcaggtagctcaaaaaggaggcggc  
gctcgggagagcgggagggtgagtcacccacacaaaggaaaaggccttccgctcctcagcctcgtctcatgtgactccacggagtac  
cgggcgcctccaggcacctcgattagttctcagacttttggagtagctcgtcttttaggttggggggaggggttttatgcaaggagtt  
tccccacactgagtggtggagactgaagtttagggcagcttggcacttgatgtaattctccttggaaatttgcctttttgagtttggat  
cttggttcattctcaagcctcagacagtggttcaagtttttttcttccatttcagggtgctgtaaaactctagcgttccgctcag  
actagctcaGCTAGCGCTACCGGTCGCCACCatgggtgagcaagggcgaggagggtcatcaaagagttcatgcgcttcaagggtgcgcatgg  
agggctccatgaacggccacagagttcgagatcgagggcgagggcgagggcgcggcctacgagggcaccacagaccgcaagctgaagggtg  
accaagggcggccccctgccccttgccttgggacatcctgtccccccagttcatgtacggctccaaggcgtacgtgaagcaccggcga  
catccccgattacaagaagctgtccttccccgagggcttcaagtgaggagcgcgtgatgaacttcgaggacggcggctcgtgtgaccgtga  
cccaggactcctccctgcaggacggcagcgtgatctacaaggtgaagatgcgcggcaccacacttccccccgacggccccgtaatgcag  
aagaagaccatgggctgggaggcctccaccgagcgcctgtacccccgcgacggcgtgctgaagggcgagatccaccaggccctgaagct  
gaaggacggcggccactacctggtggagttcaagaccatctacatggccaagaagcccgtgcaactgcccggctactactacgtggaca  
ccaagctggacatcacctcccacaacgaggactacaccatcgtggaacagtagcagcgcctccgagggcgcgccaccacctgttctgggg  
catggcaccggcagcaccggcagcggcagctccggcaccgctcctccgaggacaacaacatggcgtcatcaaagagttcatgcgctt  
caagggtgcgcatggagggctccatgaacggccacgagttcgagatcgagggcgagggcgagggcgcggcctacgagggcaccacagaccg  
ccaagctgaaggtgaccaagggcggccccctgccccttgccttgcctgggacatcctgtccccccagttcatgtacggctccaaggcgtacgtg  
aagcaccggcggacatccccgattacaagaagctgtccttccccgagggcttcaagtgaggagcgcgtgatgaacttcgaggacggcggctcgtgtgaccgtga  
ctggtgaccgtgaccagagactcctcctgaggacggcagcgtgatctacaagtgagatgcgcggcaccacacttccccccgacg  
gccccgtaatgcagaagaagaccatgggctgggaggcctccaccagcgcctgtacccccgcgacggcgtgtaagggcgagatccac  
caggcctgaagctgaaggacggcggccactacctggtggagttcaagaccatctacatggccaagaagcccgtgcaactgcccggcta  
ctactacgtggacaccaagctggacatcacctcccacaacgaggactacaccatcgtggaacagtagcagcgcctccgagggcgcgccacc  
acctgttctgtacggcatggacgagctgtacaagGTcactCggtTgaaaacctgtacttcaaaggtatgggtgagcaagggcgaggag  
gtcatcaaagagttcatgcgcttcaagggtgcgcatggagggctccatgaacggccacagagttcgagatcgagggcgagggcgagggcgcg  
ccccacgagggcaccacagaccgcaagctgaaggtgaccaagggcggccccctgccccttgccttgcctgggacatcctgtccccccagttca

tgtacggctccaagggctacgtgaagcaccgcccgcgacatccccgattacaagaagctgtccttccccgagggcttcaagtgggagcgc  
gtgatgaacttcgaggacggcggtctggtgaccgtgaccaggactcctcctgcaggacggcagctgatctacaaggtgaagatgcg  
cggcaccaacttccccccgacggccccgtaatgcagaagaagaccatgggctgggaggcctccaccgagcgcctgtacccccgcgacg  
gcggtgctgaagggcgagatccaccaggccctgaagctgaaggacggcgccactacctgggtggagtccaagaccatctacatggccaag  
aagcccgtgcaactgccccggtactactacgtggacaccaagctggacatcacctcccacaacgaggactacaccatcgtggaacagta  
cgagcgtccgagggccgcccaccacctgttctggggcatggcaccggcagcaccggcagcggcagctccggcaccgcctcctccgagg  
acaacaacatggcgcgtcatcaaagagttcatgcgcttcaaggtgcgcatggagggctccatgaacggccacgagttcgagatcgagggc  
gagggcgagggccgccccctacgagggcaccagaccgccaagctgaaggtgaccaagggcgggccccctgccccttcgctgggacatcct  
gtccccccagttcatgtacggctccaagggctacgtgaagcaccgcccgcgacatccccgattacaagaagctgtccttccccgagggct  
tcaagtgggagcgcgtgatgaacttcgaggacggcggtctggtgaccgtgaccaggactcctcctgcaggacggcagctgatctac  
aaggtgaagatgcgccgccaacttccccccgacggccccgtaatgcagaagaagaccatgggctgggagctgggagctccaccgagcgtc  
gtacccccgcgacggcgctgctgaagggcgagatccaccaggccctgaagctgaaggacggcgccactacctgggtggagtccaagcca  
tctacatggccaagaagcccgtgcaactgccccggtactactacgtggacaccaagctggacatcacctcccacaacgaggactacacc  
atcgtggaacagtagcagcgtccgagggccgcccaccacctgttctgtacggcatggacgagctgtacaagACcactGcgtGgaaaa  
cctgtacttccaaggtatgggtgagcaagggcgaggagggtcatcaaagagttcatgcgcttcaaggtgcgcatggagggctccatgaacg  
gccacgagttcgagatcgagggcgagggcgagggcgccccctacgagggcaccagaccgccaagctgaaggtgaccaagggcgggcccc  
ctgccccttcgctgggacatcctgtccccccagttcatgtacggctccaagggctacgtgaagcaccgcccgcgacatccccgattaca  
gaagctgtccttccccgagggcttcaagtgggagcgcgtgatgaacttcgaggacggcggtctggtgaccgtgaccaggactcctccc  
tgcaggacggcagctgatctacaaggtgaagatgcgcgccaccaacttccccccgacggccccgtaatgcagaagaagaccatgggc  
tgggaggcctccaccgagcgcctgtacccccgcgacggcggtgctgaagggcgagatccaccaggccctgaagctgaaggacggcgggcca  
ctacctgggtggagtccaagaccatctacatggccaagaagcccgtgcaactgccccggtactactacgtggacaccaagctggacatca  
cctcccacaacgaggactacaccatcgtggaacagtagcagcgtccgagggccgcccaccacctgttctggggcatggcaccggcagc  
accggcagcggcagctccggcaccgcctcctccgaggacaacaacatggcgcgtcatcaaagagttcatgcgcttcaaggtgcgcatgga  
gggctccatgaacggccacgagttcgagatcgagggcgagggcgagggcgccccctacgagggcaccagaccgccaagctgaaggtga  
ccaagggcgggccccctgccccttcgctgggacatcctgtccccccagttcatgtacggctccaagggctacgtgaagcaccgcccgcgac  
atccccgattacaagaagctgtccttccccgagggcttcaagtgggagcgcgtgatgaacttcgaggacggcggtctggtgaccgtgac  
ccaggactcctcctgcaggacggcagctgatctacaaggtgaagatgcgcgccaccaacttccccccgacggccccgtaatgcaga  
agaagaccatgggctgggagggctccaccgagcgcctgtacccccgcgacggcggtgctgaagggcgagatccaccaggccctgaagctg  
aaggacggcgccactacctgggtggagtccaagaccatctacatggccaagaagcccgtgcaactgccccggtactactactacgtggacac  
caagctggacatcacctcccacaacgaggactacaccatcgtggaacagtagcagcgtccgagggccgcccaccacctgttctctgtacg  
gcatggacgagctgtacaagGTcactAcgtTgaaaaacctgtacttccaaggtatgggtgagcaagggcgaggagggtcatcaaagagttc  
atgcgcttcaaggtgcgcatggagggctccatgaacggccacgagttcgagatcgagggcgagggcgagggcgccccctacgagggcacc  
ccagaccgccaagctgaaggtgaccaagggcgggccccctgccccttcgctgggacatcctgtccccccagttcatgtacggctccaagg  
cgtacgtgaagcaccgcccgcgacatccccgattacaagaagctgtccttccccgagggcttcaagtgggagcgcgtgatgaacttcgag  
gacggcggtctggtgaccgtgaccaggactcctcctgcaggacggcagcgtgatctacaaggtgaagatgcgcgccaccaacttccc  
ccccgacggccccgtaatgcagaagaagaccatgggctgggaggcctccaccgagcgcctgtacccccgcgacggcggtgctgaagggcg  
agatccaccaggccctgaagctgaaggacggcgggccactacctgggtggagtccaagaccatctacatggccaagaagcccgtgcaactg  
ccccggtactactacgtggacaccaagctggacatcacctcccacaacgaggactacaccatcgtggaacagtagcagcgtccgaggg  
ccgcccaccacctgttctggggcatggcaccggcagcaccggcagcggcagctccggcaccgcctcctccgaggacaacaacatggccg  
tcatcaaagagttcatgcgcttcaaggtgcgcatggagggctccatgaacggccacgagttcgagatcgagggcgagggcgagggccgc  
ccccctacgagggcaccagaccgccaagctgaaggtgaccaagggcgggccccctgccccttcgctgggacatcctgtccccccagttcat  
gtacggctccaagggctacgtgaagcaccgcccgcgacatccccgattacaagaagctgtccttccccgagggcttcaagtgggagcgcg  
tgatgaacttcgaggacggcggtctggtgaccgtgaccaggactcctcctgcaggacggcagcgtgatctacaaggtgaagatgcgc  
ggcaccaacttccccccgacggccccgtaatgcagaagaagaccatgggctgggaggcctccaccgagcgcctgtacccccgcgacgg  
cgtgctgaagggcgagatccaccaggccctgaagctgaaggacggcgggccactacctgggtggagtccaagaccatctacatggccaaga  
agcccgtgcaactgccccggtactactactacgtggacaccaagctggacatcacctcccacaacgaggactacaccatcgtggaacagtag  
gagcgtccgagggccgcccaccacctgttctctgtacggcatggacgagctgtacaagACcactTcgtGgaaaaacctgtacttccaaggt  
t. atgggtgagcaagggcgaggagggtcatcaaagagttcatgcgcttcaaggtgcgcatggagggctccatgaacggccacgagttcgaga  
tcgagggcgagggcgagggcgccccctacgagggcaccagaccgccaagctgaaggtgaccaagggcgggccccctgccccttcgctgg  
gacatcctgtccccccagttcatgtacggctccaagggctacgtgaagcaccgcccgcgacatccccgattacaagaagctgtccttccc  
cgagggcttcaagtgggagcgcgtgatgaacttcgaggacggcggtctggtgaccgtgaccaggactcctcctgcaggacggcagcgc  
tgatctacaaggtgaagatgcgcgccaccaacttccccccgacggccccgtaatgcagaagaagaccatgggctgggaggcctccacc  
gagcgcctgtacccccgcgacggcggtgctgaagggcgagatccaccaggccctgaagctgaaggacggcgggccactacctgggtggagt  
caagaccatctacatggccaagaagcccgtgcaactgccccggtactactactacgtggacaccaagctggacatcacctcccacaacgagg  
actacaccatcgtggaacagtagcagcgtccgagggccgcccaccacctgttctggggcatggcaccggcagcaccggcagcggcagc  
tccggcaccgcctcctccgaggacaacaacatggccgtcatcaaagagttcatgcgcttcaaggtgcgcatggagggctccatgaacgg  
ccacgagttcgagatcgagggcgagggcgagggccgccccctacgagggcaccagaccgccaagctgaaggtgaccaagggcgggcccc  
tgccccttcgctgggacatcctgtccccccagttcatgtacggctccaagggctacgtgaagcaccgcccgcgacatccccgattacaag  
aagctgtccttccccgagggcttcaagtgggagcgcgtgatgaacttcgaggacggcggtctggtgaccgtgaccaggactcctcct  
gcaggacggcagcgtgatctacaaggtgaagatgcgcgccaccaacttccccccgacggccccgtaatgcagaagaagaccatgggct  
gggaggcctccaccgagcgcctgtacccccgcgacggcggtgctgaagggcgagatccaccaggccctgaagctgaaggacggcgggcca  
tacctgggtggagtccaagaccatctacatggccaagaagcccgtgcaactgccccggtactactactacgtggacaccaagctggacatcac  
ctcccacaacgaggactacaccatcgtggaacagtagcagcgtccgagggccgcccaccacctgttctctgtacggcatggacgagctgt



C) AVA2626[RFP(PTC+), Hygromycin<sup>R</sup>]:

tDNA1: 1045-1141

EF1alfa promoter: 1176-2679

5xtmTomato: 2702-9994

TEV protease: 9995-10720

PEST (degradation sequence): 10748-10882

Human beta-globin( $\Delta$ I1): 10889-12271

PTC39: 11003-11005

BGH polyA: 12293-12517

tDNA2: 12803-12899

FRT: 12910-12957

HygromycinR (lacks promoter and 1<sup>st</sup> Methionine): 12977-14253

Acttcatttttaatttaaaaggatctaggtgaagatccttttttgataatctcatgacccaaaatcccttaacgtgagtttctggtccact  
gagcgtcagaccccgtagaaaagatcaaaggatcttcttgagatcctttttttctgcgcgtaatctgctgcttgcaacaaaaaacca  
ccgctaccagcgggtggtttgtttgcccgatcaagagctaccaactcctttttccgaaggtaactggcttcagcagagcgcagataccaaa  
tactgtccttctagtgtagccgtagtttagggcaccacttcaagaactctgtagcaccgcctacatacctcgctctgctaactcctgttac  
cagtggtgctgctgccagtgggcgataaagtcgtgtcttaccgggttggactcaagacgatagttaccgggataaggcgcagcggctcgggctga  
acgggggggttcgtgacacagcccagcttggagcgaacgacctacaccgaactgagatacctacagcgtgagctatgagaaagcggccac  
gcttcccgaaggagaaaggcggacaggtatccggtaagcggcagggctcggaacaggagagcgcacaggggagcttccagggggaaacg  
cctggatcctttatagtcctgtcgggtttcggccacctctgacttgagcgtcgatctttttgtgatgctcgtcaggggggcggagcctatgg  
aaaaacgcagcaacgcggccttttttacggttcctggccttttggctggccttttggctcactgttctttcctgcttatcccctgattc  
tgtggataaccgtattaccgctttgagtgagctgataccgctcgcgcgagccgaacgaccgagcgcagcaggtcagtgagcaggaag  
cggaagagcgcaccaatacgcacaaaccgctctccccgcgcttggcggattcattaatgcagctggcagcagaggtttcccactggaaa  
gcccgcagtgagcgcacgcaattaatgtgagttagctcactcattagccaccccaggcACGCGAagcgttggttggttgtagtgcccg  
gttttcgaaccggggacctttcgcgtgttagggcgaacgtgataaccactacactacggaaaccaacgggtgctagACGCGTattgtctatt  
ctgactcggatcCGTACGaatctctcatgtttgacagcttatacatgattagctttggagcgaagccagcaatggtagaggggaagattct  
gcaagctccttccagggcggcctcccgcctaccaccccccaaccgcggcggagcctgagagtaattcatacaaaaggactcggc  
cctgccttggggaaaccagggaccgtcgttaaactcccactaacgtagaaccagagatcgtcgcgttcccgcctccaccgcgg  
ctctcgtcatcactgaggtggagaagagcattcgtgaggtccgggtgcggcctcagtgggcagagcgcacacgcggccagctcccggaga  
agttggggggaggggtcggcaattgaaccgggtgcctagagaaagtggcgcggggtaaactgggaaagtgatgtcgtgtactggctccgc  
ctttttcccaggggtgggggagaaaccgtatataaagtgcagtagtcgcgctgaacgttctttttcgcacgggtttgcccgcagaacaca  
ggtaagtgcgctgtgtggttcccgcgggctggcctctttacgggttatggccttgcgctgcttgaattacttccacgccccctggctg  
cagtagctgattcttgatcccagccttccgggttggaaagtgggtgggagagttcgaggccttgcgcttaaggagccccctgcctcgtgc  
ttgagttgaggcctggcctgggcgctggggcgcgcgctgcgaaatctgggtggcacccttcgcgctgtctcgtcgttctcgataagtctc  
tagccatataaaattttgatgacctgctgcgacgctttttttctggcaaga tagtcttgtaaa tgcggggccaagactcgcacactgggt  
atctcgggttttggggcgcggggcggcgacggggccgctgctcccagcgcaatgttcggcgagggcggggctcgcagcgcggccca  
gagaa tccgacgggggtagtctcaagctggcggcctgctctgggtgctggcctcgcgcgcgctgta tgcggcggccttggggcggc  
caggctggccggctcggcaccagttcgttgagcggaaaga tggcggcttcccggccctgctcaggtagctcaaaa tggaggacggcggc  
gctcgggagagcgggggggtgagtcaccacacaaaggaaaaggccttccgctcctcagcgcgctcctcatgtgactccacggagtac  
cgggcgcgctccaggcactcagattagttctcagactctttggagtagctcgtcttttaggttggggggaggggtttta tgcgagtgagtt  
tccccacactgagtggtggagactgaagttaggcagcttggcacttgatgtaattctccttggaaatttgcctttttgagtttggat  
cttggttcattctcaagcctcagacagtggttcaaagtttttttcttccatttcagggtgctgtaaaaactctagcgttctcgtctaga  
actagctcaGCTAGCGCTACCGGTCGCCACCatgggtgagcaagggcgaggagggtcatcaaagagttcatgcttcaagggtgcgcatgg  
agggctccatgaacggccacaggttcagatcgagggcgagggcgagggcggccctacgagggcaccacagaccgcaagctgaaggtg  
accaagggcggccccctgccttgcctgggacatcctgtccccccagttcatgtacggctccaaggcgtacgtgaagcaccggcggcga  
catccccgattacaagaagctgtccttcccaggggcttcaagtgaggcgcgctgatgaacttcgaggacggcggctctggtgaccgtga  
cccaggactcctccctgcaggacggcagcgtgatctacaaggtgaagatgctgcggcaccacacttccccccgacggccccgtaatgcag  
aagaagaccatgggctgggaggcctccaccgagcgcctgtacccccgcgacggcgtgctgaagggcgagatccaccaggcctgaagct  
gaaggacggcggccactacctggtggagttcaagaccatctacatggccaagaagcccgtgcaactgcccggctactactacgtggaca  
ccaagctggacatcacctcccacaacgaggactacaccatcgtggaacagtaacgagcgtccgagggcggccaccacctgttctgggg  
catggcaccggcagcaccggcagcggcagctccggcaccgctcctccgaggacaacaacatggcgtcatcaaagagttcatgctt  
caagggtgcgcatggagggctccatgaacggccacaggttcagatcgagggcgagggcgagggcggccctacgagggcaccagaccg  
ccaagctgaaggtgaccaagggcggccccctgccttgcctgggacatcctgtccccccagttcatgtacggctccaaggcgtacgtg  
aagcaccggcggcagatccccgattacaagaagctgtccttcccaggggcttcaagtgaggcgcgctgatgaacttcgaggacggcggct  
ctggtgaccgtga  
gcccgtaatgcagaagaagaccatgggtgggaggcctccaccagcgcctgtacccccgcgacggcgtgctgaagggcgagatccac  
caggcctgaagctgaaggacggcggcactacctgggtggagttcaagaccatctacatggccaagaagcccgtgcaactgcccggcta  
ctactacgtggacaccaagctggacatcacctcccacaacgaggactacaccatcgtggaacagtaacgagcgtccgagggcggccacc  
acctgttctgtacggcattgacagagctgtacaagGTcactCcggtGaaaacctgtacttcaagggtatgggtgagcaagggcgaggag

gtcatcaaagagttcatgcgcttcaaggtgcgcatggagggctccatgaacgggccacgagttcgagatcgagggcgagggcgagggccg  
cccctacgagggcaccagaccgccaagctgaaggtgaccaagggcggccccctgcccttcgctgggacatcctgtccccccagttca  
tgtacggctccaagggctacgtgaagcaccggcgacatccccgattacaagaagctgtccttccccgagggcttcaagtgggagcgc  
gtgatgaacttcgaggacggcggtctggtgaccgtgaccaggactcctccctgcaggacggcacgctgatctacaaggtgaagatgcg  
cggcaccaacttccccccgacggccccgtaatgcagaagaagaccatgggctgggaggcctccaccgagcgcctgtacccccgcgacg  
gctgtgtaagggcgagatccaccaggccctgaagctgaaggacggcggccactacctggtggagttcaagaccatctacatggccaag  
aagcccgtgcaactgcccggctactactacgtggacaccaagctggacatcacctcccacaacgaggactacaccatcgtggaacagta  
cgagcgtccgagggcgccaccacctgttctggggcatggcaccggcagcaccggcagcggcagctccggcaccgcctcctccgagg  
acaacaacatggcgtcatcaaagagttcatgcgcttcaaggtgcgcatggagggctccatgaacgggccacgagttcgagatcgagggc  
gagggcgagggcgccccctacgagggcaccagaccgccaagctgaaggtgaccaagggcggccccctgcccttcgctgggacatcct  
gtccccccagttcatgtacggctccaagggctacgtgaagcaccggcgacatccccgattaca  
tcaagtgaggcgtgatgtaacttcgaggacggcggtctggtgaccgtgaccaggactcctccctgcaggacggcagcgcctgatctac  
aagtggaagtgcgcgccaccaacttccccccgacggccccgtaatgcagaagaagaccatgggctgggaggcctccaccgagcgcct  
gtacccccgcgacggcgtgctgaagggcgagatccaccaggccctgaagctgaaggacggcggccactacctggtggagttcaagacca  
tctacatggccaagaagcccgtgcaactgcccggctactactacgtggacaccaagctggacatcacctcccacaacgaggactacacc  
atcgtggaacagtagagcgtccgagggcgccaccacctgttctgtacggcatggacgagctgtacaagACcactGcgtGgaaaa  
cctgtacttccaaggtatgggtgagcaagggcgaggagggtcatcaaagagttcatgcgcttcaaggtgcgcatggagggctccatgaacg  
gccacgagttcgagatcgagggcgagggcgagggcgccccctacgagggcaccagaccgccaagctgaaggtgaccaagggcggcccc  
ctgcccttcgctgggacatcctgtccccccagttcatgtacggctccaagggctacgtgaagcaccggcgacatccccgattaca  
gaagctgtccttccccgagggcttcaagtgggagcgcgtgatgaacttcgaggacggcggtctggtgaccgtgaccaggactcctcc  
tgcaggacggcacgctgatctacaaggtgaagatgcgcgccaccaacttccccccgacggccccgtaatgcagaagaagaccatgggc  
tgggaggcctccaccgagcgcctgtacccccgcgacggcgtgctgaagggcgagatccaccaggccctgaagctgaaggacggcggcca  
ctacctggtggagttcaagaccatctacatggccaagaagcccgtgcaactgcccggctactactacgtggacaccaagctggacatca  
cctcccacaacgaggactacaccatcgtggaacagtagagcgtccgagggcgccaccacctgttctggggcatggcaccggcagc  
accggcagcggcagctccggcaccgcctcctccgaggacaacaacatggcgtcatcaaagagttcatgcgcttcaaggtgcgcatgga  
gggctccatgaacgggccacgagttcgagatcgagggcgagggcgagggcgccccctacgagggcaccagaccgccaagctgaaggtga  
ccaagggcggccccctgcccttcgctgggacatcctgtccccccagttcatgtacggctccaagggctacgtgaagcaccggcgac  
atccccgattacaagaagctgtccttccccgagggcttcaagtgggagcgcgtgatgaacttcgaggacggcggtctggtgaccgtgac  
ccaggactcctccctgcaggacggcacgctgatctacaaggtgaagatgcgcgccaccaacttccccccgacggccccgtaatgcaga  
agaagaccatgggctgggaggcctccaccgagcctgtacccccgcgacggcgctggaagggcgagatccaccaggccctgaagctg  
aaggacggcggccactacctggtggagttcaagaccatctacatggccaagaagcccgtgcaactgcccggctactactactacgtggacac  
caagctggacatcacctcccacaacgaggactacaccatcgtggaacagtagagcgtccgagggcgccaccacctgttctgtacg  
gcatggacgagctgtacaagGTcactAcgtGgaaaaacctgtacttccaaggtatgggtgagcaagggcgaggagggtcatcaaagagttc  
atgcgcttcaaggtgcgcatggagggctccatgaacgggccacgagttcgagatcgagggcgagggcgagggcgccccctacgagggcac  
ccagaccgccaagctgaaggtgaccaagggcggccccctgcccttcgctgggacatcctgtccccccagttcatgtacggctccaagg  
cgtacgtgaagcaccggcgacatccccgattacaagaagctgtccttccccgagggcttcaagtgggagcgcgtgatgaacttcgag  
gacggcgggtctggtgaccgtgaccaggactcctccctgcaggacggcacgctgatctacaaggtgaagatgcgcgccaccaacttccc  
ccccgacggccccgtaatgcagaagaagaccatgggctgggaggcctccaccgagcgcctgtacccccgcgacggcgtgctgaagggcg  
agatccaccaggccctgaagctgaaggacggcggccactacctggtggagttcaagaccatctacatggccaagaagcccgtgcaactg  
cccggctactactacgtggacaccaagctggacatcacctcccacaacgaggactacaccatcgtggaacagtagagcgtccgaggg  
cggccaccacctgttctggggcatggcaccggcagcaccggcagcggcagctccggcaccgcctcctccgaggacaacaacatggcgg  
tcatcaaagagttcatgcgcttcaaggtgcgcatggagggctccatgaacgggccacgagttcgagatcgagggcgagggcgagggccgc  
cctacgagggcaccagaccgccaagctgaaggtgaccaagggcggccccctgcccttcgctgggacatcctgtccccccagttcat  
gtacggctccaagggctacgtgaagcaccggcgacatccccgattacaagaagctgtccttccccgagggcttcaagtgggagcgcg  
tgatgaacttcgaggacggcggtctggtgaccgtgaccaggactcctccctgcaggacggcacgctgatctacaaggtgaagatgcgc  
ggcaccacttccccccgacggccccgtaatgcagaagaagaccatgggctgggaggcctccaccgagcgcctgtacccccgcgacgg  
cgtgctgaagggcgagatccaccaggccctgaagctgaaggacggcggccactacctgggtggagttcaagaccatctacatggccaaga  
agcccgtgcaactgcccggctactactactacgtggacaccaagctggacatcacctcccacaacgaggactacaccatcgtggaacagtag  
gagcgtccgagggcgccaccacctgttctgtacggcatggacgagctgtacaagACcactTcgtGgaaaaacctgtacttccaaggt  
tatgggtgagcaagggcgaggagggtcatcaaagagttcatgcgcttcaaggtgcgcatggagggctccatgaacgggccacgagttcgaga  
tcgagggcgagggcgagggcgccccctacgagggcaccagaccgccaagctgaaggtgaccaagggcggccccctgcccttcgctgg  
gacatcctgtccccccagttcatgtacggctccaagggctacgtgaagcaccggcgacatccccgattacaagaagctgtccttccc  
cgagggcttcaagtgggagcgcgtgatgaacttcgaggacggcggtctggtgaccgtgaccaggactcctccctgcaggacggcacgc  
tgatctacaaggtgaagatgcgcgccaccaacttccccccgacggccccgtaatgcagaagaagaccatgggctgggaggcctccacc  
gagcgcctgtacccccgcgacggcgtgctgaagggcgagatccaccaggccctgaagctgaaggacggcggccactacctggtggagtt  
caagaccatctacatggccaagaagcccgtgcaactgcccggctactactacgtggacaccaagctggacatcacctcccacaacgagg  
actacaccatcgtggaacagtagagcgtccgagggcgccaccacctgttctggggcatggcaccggcagcaccggcagcggcagc  
tccggcaccgcctcctccgaggacaacaacatggcgtcatcaaagagttcatgcgcttcaaggtgcgcatggagggctccatgaacgg  
ccacgagttcgagatcgagggcgagggcgagggcgccccctacgagggcaccagaccgccaagctgaaggtgaccaagggcggcccc  
tgcccttcgctgggacatcctgtccccccagttcatgtacggctccaagggctacgtgaagcaccggcgacatccccgattacaag  
aagctgtccttccccgagggcttcaagtgggagcgcgtgatgaacttcgaggacggcggtctggtgaccgtgaccaggactcctccct  
gcaggacggcacgctgatctacaaggtgaagatgcgcgccaccaacttccccccgacggccccgtaatgcagaagaagaccatgggct  
gggaggcctccaccgagcgcctgtacccccgcgacggcgtgctgaagggcgagatccaccaggccctgaagctgaaggacggcggccac



tacctggtggagttcaagaccatctacatggccaagaagcccgtgcaactgcccggctactactacgtggacaccaagctggacatcac  
ctcccacaacgaggactacaccatcgtggaacagtagcagcgctccgagggccgccaccacctgttctgt**ta**cgggcatggacgagctgt  
acaaggaaaacctgtacttccaa**agtggagaAAGCTT**gtttaagggaccacgtgattacaaccggatatacgagcaccattttgtcatttg  
acgaatgaatctgatggggcacacaacatcgttgtatggatttggatttggtccttcatcattacaacaagcacttgtttagaagaaa  
taatggaacactgtttgggtccaatcactacatgggtgattcaaggtcaagaacaccacgactttgcaacaacacctcattgatgggaggg  
acatgataattattcgcgatgcctaaggatttcccaccatttccctcaaaagctgaaatntagagagccacaaaggggaagagcgcatatgt  
cttgtgacaaccaacttccaaactaagagcatgtctagcatgggtgctagacactagttgcacattcccttcatctgatggcatattctg  
gaagcattggattcaaaccaaggaaggcagtggtgagctccattagatcaactagagatgggttcatgttgggtatacactcagcat  
cgaatccaccaacacaaacaattatttcaaaagcgtgcccgaaaaacttcatggaattgttgacaaatcaggagggcgcagcagtggtt  
agtggttggcgattaaatgctgactcagatattgtggggggccataaagttttcatgagcaaacctgaagagccttttcagccagttaa  
ggaagcagctcaactcatgaaatgggtgtactcgaagaaacctgtacttccaa**agtATGCATAGATCACAGGATATCAGCCATG**  
**GCTTCCC GCCGGCGGTGGCGGGCAGGATGATGGCAGCTGCCCATGTCTTGTGCCAGGAGAGCGGGATGGACCGTCACCCTGCAGCC**  
**TGTGCTTCTGCTAGGATCAATGTGGAGCTC**GTGCACCTGACTCCTGAGGAGAAGTCTGCCGTTACTGCCCTGTGGGGCAAGGTGAACGT  
GGAT**GAAGTTGGTGGT**GAGGCCCTGGGCAGGCTGCTGGTGGTCTACCCTTGGACCTAGAGGTTCTTTGAGTCCTTTGGGGATCTGTCCA  
CTCCTGATGCTGTTATGGGCAACCCTAAGGTGAAGGCTCATGGCAAGAAAGTGTCTGGTGCCTTTAGTGATGGCCTGGCTCACCTGGAC  
AACCTCAAGGGCACCTTTGCCACACTGAGTGAGCTGCCTGTGACAAGCTGCACGTGGATCCTGAGAACTTCAGG**GTGAGTCTATGGGA**  
CCCTTGATGTTTTCTTTCCCCTTCTTTCTATGGTTAAGTTCATGTCTATAGGAAGGGGATAAGTAACAGGGTACAGTTTAGAATGGGAA  
ACAGACGAATGATTGCATCAGTGTGGAAGTCTCAGGATCGTTTTAGTTCTTTTATTTGCTGTTTATAACAATTGTTTTCTTTGTTTA  
ATTCTTGCTTTCTTTTTTTTTCTTCTCCGCAATTTTTACTATTATACTTAATGCCTTAACATTGTGTATAACAAAAGGAAATATCTCTG  
AGATACATTAAGTAACCTTAAAAAAAACCTTTACACAGTCTGCCTAGTACATTACTATTTGGAATATATGTGTGCTTATTTGCATATTC  
ATAATCTCCCTACTTTATTTCTTTTATTTTAAATTGATACATAATCATTATACATATTTATGGGTTAAAGTGTAAATGTTTTAATATGT  
GTACACATATTGACCAATCAGGGTAATTTGCATTTGTAATTTTAAAAAATGCTTTCTTTTAAATATACTTTTTTGTATCTTTAT  
TTCTAATACTTTCCCTAATCTCTTTCTTTTCCAGGGCAATAATGATACAATGTATCATGCCTCTTTGCACCATTCTAAAGAATAACAGTGA  
TAATTTCTGGGTTAAGGCAATAGCAATATTTCTGCATATAAATATTTCTGCATATAAATGTAAGTGTGTAAGAGGTTTCATATTGCT  
AATAGCAGCTACAATCCAGCTACCATTCTGCTTTTATTTTATGGTTGGGATAAGGCTGGATTATTCTGAGT**CCAAGCTAGGCCCTTTTG**  
**CTAATCATG**TTTCATACCTCTTATCTTCTCCACAGCTCCTGGGCAACGTGCTGGTCTGTGTGCTGGCCCATCACTTTGGCAAAGAATT  
CACCCCACAGTGCAGGCTGCCTATCAGAAAAGTGGTGGCTGGTGTGGCTAATGCCCTGGCCACAAGTATCA**TAA**GC**GGCCGC**TCGCT  
TTCTTGCTGCTCAATTTCTATTAAAGTTCTTTGTTCCCTAAGTCCAACACTAAACTGGGGGATATTATGAAGGGC**CTCGAGCTGA**  
**TCAGCTGACTGCTGTGCCTTAG**TTGCCAGCCATCTGTTGTTTGGCCCTCCCCGCTGCCTTCTTTGACCTTGAAGGTTGCCACTCCCAC  
TGTCTTTTCTAATAAAAATGAGGAAATTCATCGCATTGTCTGAGTAGGTGTCATTCTATTCTGGGGGGTGGGGTGGGGCAGGACAGCA  
AGGGGGAGGATTGGGAAGACAATAGCAGGCATGCTGGGGATGCGGTGGGCTCTATGGCTTCTGAGGCGGAAAGAACCAGCTGGGGCTCT  
AGGGGGTATCCCCACGCGCCCTGTAGCGGCGCATTAAAGCGCGGGGTTGTTGGTTACGCGCAGCGTGACCGCTACACTTGCCAGCGC  
CCTAGCGCCCGCTCCTTTGCTTTCTTCCCTTCTTTCTCGCCACGTTGCGCGGCTTTCCCGCTCAAGCTCTAAATCGGGGGCTCCCTT  
TAGGGTTCCGATTTAGTGCTTTACGGCACCTCGACCCCAAAAAAATTTGATTAGGGTGATGGTTACAGTAGGTAC**Gctagcaccg**ttgg  
ttccgtagtgtagtggttatcaagttcgcctaacaacgcgaaaggtccccggttcgaaaccgggcaactacaaaccaacaacgctGGTACC  
CCTAGAAGTTCTATTCCGAAGTTCTATTCT**CTAGAAAGTATAGGA**ACTTCTTGGCCAAAAAGCCTGAACTCACCGCGACGTCTGTC  
GAGAAGTTCTGATCGAAAAGTTCGACAG**CGTCTC**CGACCTGATGCAGCTCTCGGAGGGCGAAGAATCTCGTGCTTTTCAGCTTCGATGT  
AGGAGGGCGTGGATATGCTCTGCGGGTAAATAGCTGCGCCGATGGTTTCTACAAAGATCGTTATGTTTATCGGCACCTTTGCATCGGCCG  
CGCTCCCGATTCCGGAAGTGCTTGACATTGGGGAATTACAGCGAGAGCCTGACCTATTGCATCTCCCGCCGTGCACAGGGTGTACAGTTG  
CAAGACCTGCCTGAAACCGAACTGCCCGCTGTTCTGCAGCCGGTGCAGGAGCCATGGATGCGATCGCTGCGGCCGATCTTAGCCAGAC  
GAGCGGGTTCCGGCCATTCCGACCGCAAGGAATCGGTCAATACACTACATGGCGTGATTTTCATATGCGCGATTGCTGATCCCCATGTGT  
ATCACTGGCAAACCTGTGATGGACGACACCGTCACTGCGTCCGTGCGCGAGGCTCTCGATGAGCTGATGCTTTGGGCCGAGGACTGCCCC  
GAAGTCCGGCACCTCGTGCACGCGGATTTCCGGCTCCAACAATGTCTTGACGGACAATGGCCGCATAACAGCGGTCAATTGACTGGAGCGA  
GGCGATGTTCCGGGATTTCCAATACGAGGTCCGCAACATCTTCTTCTGGAGGCCGTGGTTGGCTTGTATGGAGCAGCAGACGCGCTACT  
TCGAGCGGAGGCATCCGGAGCTTGCAAGTTCGCGCGGCTCCGGGCGTATATGCTCCGATTTGGTCTTGACCAACTCTATCAGAGCTTG  
GTTGACGGCAATTTTCGATGATGACGCTTGGGCGAGGGTGCATGCGACGCAATCGTCCGATCCGGAGCCGGGACTGTCGGGCGTACACA  
AATCGCCCGCAGAAGCGCGCCGTCTGGACCGATGGCTGTGTAGAAGTACTCGCCGATAGTGGAACCAGCCGCCACAGCCTCGTCCGA  
GGCAAAGGA**TAG**CACGTAACAGGATTTTCGATTCCACCGCCGCTTCTATGAAAGGTTGGGCTTCCGGAATCGTTTTCCGGGACGCC  
GGCTGGATGATCCTCCAGCGCGGGGATCTCATGCTGGAGTTCTTTCGCCACCCCAACTTGTATTATTCAGCTTATAATGGTTACAAATA  
AAGCAATAGCATCACAAATTTACAAATAAAGCATTTTTTTCACTGCATTCTAGTTGTGGTTTGTCCAAACTCATCAATGTATCTTATC  
ATGTCTGTATACC**GTCGAC**aggtggcacttttcggggaaatgtgcgcggaaccctatttgtttatTTTTTCTAAATACATTCAAATATG  
tatccgctcatgagacaataaccctgataaatgcttcaataatattgaaaaaggaagagtatgagtattcaacattttccgtgtgcct  
tattcccttttttgcggcattttgccttccctgtttttgctcaccagaaaacgctggtgaaagttaaagatgctgaagatcagttgggtg  
cacgagtgggttacatcgaactggatctcaacagcggtaagatccttgagagttttcgccccgaagaacgttttccaatgatgagcact  
tttaaagttctgctatgtggcgcggtatttatccgctattgacgcggggcaagagcaactcggctgcgcgcatacactattctcagaatga  
cttgggtgagtaactcaccagtcacagaaaagcatcttacggatggcatgacagtaagagaattatgcagtgctgccataaccatgagtg  
ataacactgcccgaacttacttctgacaacgatcggaggaccgaaggagctaaccgcttttttgcacaacatgggggatcatgtaact  
cgccttgatcgttgggaaccggagctgaatgaagccataccaacgacgagcgtgacaccacgatgcctgtagcaatggcaacaacggt  
gcgcaaacatttaactggcgaactacttactctagcttcccggcaacaattaatagactggatggagggcggaataaagttgcaggaccac  
ttctgcgctcg**gccttccg**gtggtggtttattgctgataaatctggagccggtgagcgtg**gcttcg**cggtatcattgcagcactg  
gggcccagatggtaagccctcccgtatcgtagttatctacacgacggggagtcaggcaactatggatgaacgaaatagacagatcgcgtga  
gataggtgcctcactgattaagcattggtaactgtcagaccaagtttactcatatatacttttagattgatttaa

D) AVA2598[GFP(PTC-), Puromycin<sup>R</sup>]:

tDNA1: 1045-1141

EF1alfa promoter: 1176-2679

5xEGFP: 2702-6439

TEV protease: 6440-7165

PEST (degradation sequence): 7193-7327

Human beta-globin (HBB): 7334-8716

BGH polyA: 8783-8962

tDNA2: 9248-9344

FRT: 9355-9402

PuromycinR (lacks promoter and 1<sup>st</sup> Methionine): 9578-10407

acttcatttttaattttaaaggatctaggtgaagatcctttttgataatctcatgacccaaaatcccttaacgtgagtttctggtccact  
gagcgtcagaccocgtagaaaagatcaaaggatcttcttgagatccttttttctgcgcgtaatctgctgcttgcaacaaaaaacca  
ccgctaccagcgggtggtttgtttgcccgatcaagagctaccaactccttttccgaaggtaactggcttcagcagagcgcagataccaaa  
tactgtccttctagtgtagccgtagtttagggcaccacttcaagaactctgtagcaccgcctacatacctcgcctctgctaactcctggttac  
cagtggtgctgctgccagtgggcgataagtctgtcttaccgggttggactcaagacgatagttaccggataaggcgcagcgggtcgggctga  
acgggggggttctgtgcacacagcccagcttggagcgaacacactacccgaactagatatacagcgtgagctatgagaaagcggcac  
gcttcccgaaggagaaaggcggacaggtatccggtaagcggcagggctcggaacaggagagcgcacaggggagcctccagggggaaacg  
cctggtatcctttatagtcctgtcgggtttcgccacctctgacttgagcgtcgatttttgtgatgctcgtcagggggcggagcctatgg  
aaaaacgccagcaacgcggcctttttacgggttctggtccttttctgctggccttttctgctcactatgttcttttctgcttaccctgatc  
tgtggataaccgtattaccgctttgagtgagctgataccgctcgcgcgcagccgaacgcagcgcagcagctcagtgagcaggaag  
cggagagcgcaccaatacgcacaaaccgctctccccgcgcttggcggattcattaatgcagctggcagcagaggtttcccactgga  
gccccagtgagcgcacgaattaatgtgagttagctcactcattagccacccaggcACGCGAagcgttggttggttttagtgcccg  
gtttcgaaccggggacctttcgcgtgttagggcgaacgtgataaccactacactacggaaaccaacgggtgctagACGCGTattgtctatt  
ctgactcggatcCGTACGaatctctcatgtttgacagcttatacatcgattagctttggagcgaagccagcaatggtagaggggaagattct  
gcacgtcccttcaggcggcctccccgtcaccaccccccaaccgccccgaccggagctgagagtaattcaatacaaaaggactcggc  
cctgccttggggaaaccaggacgcgtgtaaacctccactaacgtagaaccagagatcgcctgcgttccccccccctcaccgccccg  
ctctcgtcatcactgaggtggagaagagcatgcgtgaggtccgggtgcccgtcagtgggcagagcgcacatcgcaccacagtcccccgaga  
agttggggggaggggtcggcaattgaaccgggtgcctagagaaagtggcgcggggtaaactgggaaagtgatgtcgtgtactggctccgc  
ctttttcccaggggtgggggagaaaccgtatataaagtgcagtagtcgcctgaaacgttctttttcgcacacgggtttgcccgcagaacaca  
ggtaagtgcctgtgtgtggttccccgcccctggcctctttacgggttatggcccttgcctgcaattacttccacgccccctggctg  
cagtagctgattcttgatccccagccttccgggttggaaagtgggtgggagagttcgaggccttgcgcttaaggagcccccttgcctcgtgc  
ttgagttgaggcctggcctgggcgctggggcgcgcgctgcgaaatctgggtggcacccttgcgcctgtctcgcctgctttcgataagtctc  
tagccatttaaaattttgatgacctgctgcgacgctttttttctggcaaga tagtcttgtaaatgcggggccaagatctgcacactgggt  
atctcggtttttggggcgcggggcggcgacggggcccgtgcgtcccagcgcacatgttcggcgaggcggggcctgcgagcgcggccacc  
gagaaatcggacgggggtagctcacaagctggcggcctgctctgggtgcctggcctgcgcgcgcgctgtaacgcgcccccctggggcggcaa  
caggtcggcccggctggcaccagttgctgagcggaaagatggcgccttcccggcctgctgcaggtagctcaaaaaggaggcgcggc  
gctcgggagagcgggctgggtgagtcacccacacaaaggaaaaggccttccgctcctcagcgcctcctcatgtgactccacggagtac  
cgggcgcctccaggcacctcgattagttctcagacttttggagtagctcgtcttttaggttggggggaggggttttatgcaatggagtt  
tccccacactgagtggtgggagactgaagttaggccagccttggcacttgatgtaattctccttggaaatggccctttttgagtttggat  
cttggttcattctcaagcctcagacagtggttcaagtttttttcttccatttcagggtgctgtaaaaactctagcgtttccgctctaga  
actagttcaGCTAGCGCTACCGGTCGCCACCatgggtgagcaagggcgaggagctggttaccgggggtgggtgcccatcctggctcagcgtgg  
acggcgacgtaaacggccacaagttcagcgtgtccggcgagggcgagggcgatgccacctacggcaagctgacctgaagttcaatctgc  
accaccggcaagctgcccgtgcccctggcccaccctcgtgaccaccctgacctacggcgtgcagtgcttcagcgcctaccccgaccacat  
gaagcagcagcacttctcaagtcgccatgcccgaaaggctacgtccaggagcgcaccaatcttctcaaggacgacggcaactacaaga  
cccgcgcgaggtgaagttcgagggcgacaccctggtgaaccgcacatcgagctgaagggcatcgacttcaaggaggacggcaacatcctg  
gggcacaagctggagttacaactacaacagccacaacgtctatatacatggccgacaagcagaagaacggcatcaaggtgaacttcaagat  
ccgccacaacatcgaggacggcagcgtgcagctcgcgcgaccactaccagcagaacacccccatcggcgacggccccctgctgctgcccg  
acaaccactacctgagcaccagctccgcccctgagcaaaagaccccaacgagaagcgcgatcacatggtcctgctggagttcgtgacggcc  
gcccggatcactctcggcatggacgagctgtacaagGTcactCcggtTgaaaacctgtacttccaaaggtaggtgagcaagggcgagga  
gctgttaccgggggtgggtgccatcctggctcagctggacggcgacgtaaacggccacaagttcagcgtgtccggcgagggcgagggcg  
atgccacctacggcaagctgacctgaagttcaatctgcaccaccggcaagctgcccgtgcccctggcccaccctcgtgaccaccctgacc  
tacggcctgactgcttcagcgcctaccccaccacataagcagcagcactcttcaagtcgcctacgccgaaggtcagcaggtcagctcagga  
gcccacctctcttcaaggacagcggcaactacaagaaccgcgcgaggtgaagttcgagggcgacccccctgggtgaaccgcatcgagc  
tgaagggcatcgacttcaaggaggacggcaacatcctggggcacaagctggaggtacaactacaacagccacaacgtctatatacatggcc  
gacaagcagaagaacggcatcaaggtgaacttcaagatccgccacaacatcgaggacggcagcgtgcagctcgcgcgaccactaccagca  
gaacacccccatcggcgacggccccctgctgctgcccgacaaccactacctgagcaccagctccgcccctgagcaaaagaccccaacgaga  
agcgcgatcacatggctcctgctggagttcgtgaccgcgcgcgggatcactctcggcatggacgagctgtacaagACcactGcgtGgaa  
aacctgtacttccaaaggtaggtatgggtgagcaagggcgaggagctgttaccgggggtgggtgccatcctggctcagctggacggcgagctaaa  
cggccacaagttcagcgtgtccggcgagggcgagggcgatgccacctacggcaagctgacctgaagttcaatctgcaccaccggcaagc

tgcccggtgccctggcccaccctcgtagaccaccctgacctacggcgtgacgtgcttcagccgctaccccgaccacatgaagcagcagcagc  
ttcttcaagtcgccaatgcccgaaggctacgtccaggagcgcaccaatcttcttcaaggacgcaggcaactacaagaccgcgcccagggt  
gaagttcgagggcgacaccctgggtgaaccgcatcgagctgaagggcatcgacttcaaggaggacggcaacatcctggggcacaagctgg  
agtacaactacaacagccacaacgtctatatcatggccgacaagcagaagaacggcatcaaggtgaacttcaagatccgccacaacatc  
gaggacggcagcgtgacgtcgccgaccactaccagcagaacacccccatcggcgacggccccctgctgctgcccgaacaaccactacct  
gagcaccagtcgcccctgagcaaaagaccccacgagaagcgcgatcacaatggtcctgctggagttcgtgaccgcccgcgggatcactc  
tcggcatggacgagctgtacaag**GTcactAcgtgT**gaaaacctgtacttccaa**ggtatggtgagcaagggcgaggagctgttcaccggg**  
gtggtgcccatcctggtcgagctggacggcgacgtaaacggccacaagttcagcgtgctcggcgagggcgaggggcgatgccacctacgg  
caagctgaccctgaagttcatctgaccaccggcaagctgcccgtgccctggcccaccctcgtagaccaccctgacctacggcgtgacgt  
gcttcagccgctaccccgaccacatgaagcagcagcacttcttcaagtcgccaatgcccgaaggctacgtccaggagcgcaccaatcttc  
tcaaggacgagcggcaactacaagaccgcgcaggtgagtagtctgagggcgacacccctgggtgaaccgcatcgagctgaagggca  
cttcaaggacgagcggcaactacaagaccgcgcaggtgagtagtctgagggcgacacccctgggtgaaccgcatcgagctgaagggca  
acggcatcaaggtgaacttcaagatccgccacaacatcgaggacggcagcgtgacgtcgccgaccactaccagcagaacacccccatc  
ggcgacggccccctgctgctgcccgacaaccactacctgagcaccagtcgcccctgagcaaaagaccccacgagaagcgcgatcaca  
ggtcctgctggagttcgtgaccgcccgcgggatcactctcggcatggacgagctgtacaag**ACcactTcgtgCg**aaaacctgtacttcc  
aa**ggtatggtgagcaagggcgaggagctgttcaccgggggtggtgcccatcctggtcgagctggacggcgacgtaaacggccacaagttc**  
agcgtgctcggcgagggcgagggcgatgccacctacggcaagctgaccctgaagttcatctgaccaccggcaagctgcccgtgccctg  
gcccaccctcgtagaccaccctgacctacggcgtgacgtgcttcagccgctaccccgaccacatgaagcagcagcacttcttcaagtcg  
ccatgcccgaaggctacgtccaggagcgcaccaatcttcttcaaggacgacggcaactacaagaccgcgcccaggtgagttcgagggc  
gacaccctgggtgaaccgcatcgagctgaagggcatcgacttcaaggaggacggcaacatcctggggcacaagctggagtacaactaca  
cagccacaacgtctatatcatggccgacaagcagaagaacggcatcaaggtgaacttcaagatccgccacaacatcgaggacggcagc  
tgcagctcgccgaccactaccagcagaacacccccatcggcgacggccccctgctgctgcccgacaaccactacctgagcaccagtc  
gcccctgagcaaaagaccccacgagaagcgcgatcacaatggtcctgctggagttcgtgaccgcccgcgggatcactctcggcatggacg  
gctgtacaag**gaaaacctgtacttccaaAg**tg**ggagaAAGCTT**gtttaa**gggaccacgtgattacaaccggatctcgagcaccatttgtc**  
**atttgacgaatgaatctgatgggcacacaacatcgtttgatggtattggatttgggtcccttcatcattacaacaacagcacttgtttaga**  
**agaaataatggaaactgtttggtccaatcactacatggtgtattcaaggtcaagaacaccacgacttggcaacaacacctcattgatgg**  
**gagggacatgataattattcgcatgctaaggatttcccaccatttcttcaaaagctgaaatttagagagccacaaaggggaagagcgca**  
**tatgtcttgtgacaaccaacttcaaaactaagagcattctagcatggtgtcgacacactagttgcacatttcccttcatctgatggcata**  
**tcttgaagcattggattcaaaccaaggaatgggcagctgcccattagtaacaactagagatgggttcatgttgggtgatacactc**  
**agcatgaaatttccacaacacaaacaaattatttcaacagcgtgcccgaacacctcattggaaattgttgacaaaatcagggtggcagcag**  
**gggttagtgggtggcgattaaatgctgactcagatatttggggggggccataaaagtttcatgagcaaacctgaagagccttttcagcca**  
**gtaaaggaagcactcaactcatgaatgaattggtgtactcgcaagaaaacctgtacttccaa**agtATGCATAGATCA**CGAGATATCAG**

CCATGGCTTCCC GCCGGCGGTGGCGGGCAGGATGATGGCACGCTGCCCATGTCTTGTGCCAGGAGAGCGGGATGGACCCTCACCCCTG  
CAGCCTGTGCTTCTGCTAGGATCAATGTGGAGCTCGTGACCTGACTCCTGAGGAGAAGTCTGCCGTTACTGCCCTGTGGGGCAAGGTG  
AACGTGGAT**GAAGTTGGTGGTGAGGCCCTGGGCAG**GCTGCTGGTGGTCTACCCTTGGACC**CAGAGGTTCTTTGAGTCTTTGGGGATCT**  
GTCCACTCCTGATGCTGTTATGGGCAACCCTAAGGTGAAGGCTCATGGCAAGAAAGTGTCTGGTGCCTTTAGTGATGGCCTGGCTCACC  
TGGACAACCTCAAGGGCACCTTTGCCACACTGAGTGAGCTGCCTGTGACAAGCTGCACGTGGATCCTGAGAACTTCAGGGTGAGTCTA  
TGGGACCCTTGATGTTTTCTTTCCCTTCTTTTCTATGGTTAAGTTCATGTGCATAGGAAGGGGATAAGTAACAGGGTACAGTTTAGAAT  
GGGAAACAGACGAATGATTGCATCAGTGTGGAAGTCTCAGGATCGTTTTAGTTTTCTTTTATTTGCTGTTTATAACAATTTGTTTTCTTTT  
GTTTAAATCTTGCTTTCTTTTTTTTTCTTCTCCGCAATTTTTACTATTATACTTAATGCCTTAACATTGTGTATAACAAAAGGAAATAT  
CTCTGAGATACATTAAGTAACCTTAAAAAAAACCTTTACACAGTCTGCCTAGTACATTACTATTTGGAATATATGTGTGCTTATTTGCA  
TATTCATAATCTCCCTACTTTATTTTCTTTTATTTTAAATTGATACATAATCATTATACATATTTATGGGTAAAGTGAATGTTTTAA  
TATGTGTACACATATTGACCAAATCAGGGTAATTTTGCATTTGTAATTTTAAAAAATGCTTTCTTCTTTTAAATATACTTTTGTTTAT  
CTTATTTCTAATACTTTCCCTAATCTCTTTCTTTTCCAGGGCAATAATGATACAATGTATCATGCCTCTTTGCACCATTCTAAAGAATAAC  
AGTGATAATTTCTGGGTAAAGGCAATAGCAATATTTCTGCATATAAATATTTCTGCATATAAATTTGTAAGTGTGTAAGAGGTTTCATA  
TTGTCTAATAGCAGTACAATCCAGCTACCATTCTGCTTTTATTTTATGTTGGGATAAGGCTGGATTATTTCTGAGT**CCAAGCTAGGCC**  
**TTTTGTCTAATCAGT**TTTATCTTATCTTCTTCTCCACAGCTCCTGGGCAACGTGCTGGTCTGTGTGCTGCTGGCCACTCACTTTGGCAAA  
GAATTCACCCACCAGTGCAGGCTGCCTATCAGAAAGTGGTGGCTGGTGTGGCTAATGCCCTGGCCCAAGATAC**TAAGCGGCCGC**  
TCGCTTTCTTGCTGTCCAATTTCTATTAAGGTTCTTTGTTCCCTAAGTCCAACACTACTAAACTGGGGGATATTATGAAGGGCTCGAG  
GC**TGATCAGCCTCGACTGTGCCTTCTAG**TTGCCAGCCATCTGTTGTTTGGCCCTCCCCCGTGCCTTCTTTGACCCTGGAAGGTGCCACT  
CCCCTGCTCCTTTTCTAATAAAAATGAGGAAATGCATCGCATTGTCTGAGTAGGTGTCATTCTATTCTGGGGGTGGGGTGGGGCAGGA  
CAGCAAGGGGGAGGATTGGGAAGACAATAGCAGGCATGCTGGGGATGCGGTGGGCTCTATGGCTTCTGAGGCGGAAAGAACCAGCTGGG  
GCTCTAGGGGGTATCCCCACGCGCCCTGTAGCGGCGCATTAAAGCGCGGGGGTGTGGTGGTTACGCGCAGCGTGACCGCTACACTTGCC  
AGCGCCCTAGCGCCGCTCCTTTGCTTTCTTCCCTTCTTTCTCGCCACGTTTCGCCGGCTTTCCCCGTCAAGCTCTAAATCGGGGGCT  
CCCTTTAGGGTTCCGATTTAGTGCTTTACGGCACCTCGACCCAAAAAATTTGATTAGGGTGATGGTTACGTAGGTAC**Gctagcaccg**  
**ttggtttccgtagtgtagtggttatcagcttcgctaacacgcgaaaggtccccggttcgaaaccggggcactacaacccaacaacgctG**  
**GTACCCTAGAAGTTCTTATTCCGAAGTTCTTATTCTTAGAAAGTATAGGAACCTTC**CTTGGCCAAAAAGCCTGAA**agatcacgagata**  
**tcagccatggcttcccgcggcggtggcgggcagagatgatggcacgctgcca**Cgtctt**gtgccaggagagcggga**Cggaccgtcac****  
**cctgcagcctgtgcttctgctaggatcaatgtgaaaacctgtacttccaa**Ggt**accgagtacaagcccacgggtgcgctcgcaccgc**  
**cgacgacgtccccagggccgt**C**gcaccctcgccgcgcgcttcgccgactccccgccacgcgccacaccgtcgatccggaccgccaca**  
**tcgagcgggtcaccgagct**gcaagaactcttccctcaccggc**gtcgggtcgacatcggcaaggtgtgggtcgcggaagcagcggcgccgcg**  
**gtggcggtctggaccacgcggagagcgtcgaagcggggcggtgttcgccgagatcggcccgcgcagtgccgagttgagcggttccc**  
**gctggccgcgcagcaacagatggaagggcctcctggcgccgacccggcccaaggagcccgcgtggttctggccaaccgtcggcgtctcgc**

ccgaccaccagggcaagggctctgggcagcgcctgctcgtgctccccggagtggaggcggccgagcgcgcgggggtgccgccttctctggag  
acctccgcgccccgcaacctccccctctacgagcggctcggcttcaccgtcaccgcccagcgtcgaggtgccgaaggaccgcgc**cacctg**  
**gtg**catgaccgcgaagcccgggtgc**ctga**ggta**ccgctc**gctcgtgatcagcctcgactgtgccttctagttgccagccatctgttgtttgcc  
cctcccccgctgccttctctgaccctggaaggtgccactcccactgtcctttcctaataaaaatgaggaaattgcatcgcattgtctgagt  
aggtgtcattctattctgggggggtgggggtggggcaggacagcaagggggaggattgggaagacaatagcaggcatgctgggga**GTCGAC**  
aggtggcacttttcggggaaatgtgcgcggaaccctatattgtttatattttctaaatacattcaaataatgtatccgctcatgagacaat  
aacctgataaatgcttcaataatattgaaaaaggaagagtatgagtattcaacatttcctgtgctgccttattcccttttttgcgga  
ttttgccttctctgtttttgctcaccagaaaacgctgggtgaaagtaaaagatgctgaagatcagttgggtgcacgagtgggttacatcga  
actggatctcaacagcggtaagatccttgagagttttcgccccgaagaacgttttccaatgatgagcacttttaagttctgctatgtg  
gcgcggtattatcccgtattgacgcgggcaagagcaactcggctcgccgcatacactattctcagaatgacttgggtgagtactacca  
gtcacagaaaagcatcttacggatggcatgacagtaagagaattatgcagtgtgcataaccatgagtataacactgcggccaactt  
acttctgacaacgatcggaggaccgaaggagtaaccgcttttttgcaacaacatgggggatcatgtaactgccttgatcgttgggaac  
cggagctgaatgaagccataccaaacgacgagcgtgacaccagatgcctgtagcaatggcaacaacgcttgcgcaaacattaactggc  
gaactacttactctagcttcccggaacaattaatagactggatggaggcggataaagttgcaggaccacttctgcgctcg**gccttcc**  
**ggc**tggtggtttattgctgataaatctggagccggtgagcgtg**ggtctc**gcggtatcattgcagcactggggccagatggtaagcct  
cccgatcgtagttatctacagcaggggagtcaggcaactatggatgaacgaaatagacagatcgtgagataggtgcctcactgatt  
aagcattggtaactgtcagaccaagtttactcatatatacttttagattgatttaa

E) AVA2600[GFP(PTC+) Puromycin<sup>R</sup>]:

tDNA1: 1045-1141

EF1alfa promoter: 1176-2679

5xEGFP: 2702-6439

TEV protease: 6440-7165

PEST (degradation sequence): 7193-7327

Human beta-globin (HBB): 7334-8716

PTC39: 7448-7450

BGH polyA: 8783-8962

tDNA2: 9248-9344

FRT: 9355-9402

PuromycinR (lacks promoter and 1<sup>st</sup> Methionine): 9578-10407

acttcatttttaatttaaaaggatctaggtgaagatcctttttgataatctcatgacccaaaatcccttaacgtgagtttctggtccact  
gagcgtcagaccccgtagaaaagatcaaaggatcttcttgagatccttttttctgcgcgtaatctgctgcttgcaacaaaaaacca  
ccgctaccagcgggtggtttggttgcggatcaagagctaccaactccttttccgaaggtaactggcttcagcagagcgcagataccaaa  
tactgtccttctagtgtagccgtagtttaggccaccacttcaagaactctgtagcaccgcctacatacctcgctctgctaactcctggtac  
cagtggtgctgctgccagtgggcagataagtcgtgcttaccggggttggactcaagacgatagttaccgggataaggcgcagcgggtcgggctga  
acgggggggttcgtgcacacagcccagcttggagcgaacgacctacaccgaactgagatacctacagcgtgagctatgagaaagcggccac  
gcttcccgaaggagaaaggcgggacaggtatccggtaagcggcagggctcggaacaggagagcgcacgagggagcttccagggggaaacg  
cctggatcctttatagtcctgtcgggttccggccactctgacttgagcgtcgatttttggatgctcgtcagggggcgggagcctatgg  
aaaaacgcagcaacgcggcctttttacggttcctggccttttggctggccttttggctcagatgttctttcctgcttatccccgattc  
tgtggataaccgtattaccgctttgagtgagctgataccgctcgcgcgagccgaacgaccgagcgcagcaggtcagtgagcaggaag  
cggaagagcgcaccaatacgcacaaaccgctctccccgcgcttggcggattcattaatgcagctggcagcagaggttccccgactggaaa  
gcgggcagtgagcgcacgcaattaatgtgagttagctcactcattagccaccccaggcACGCGAagcgttggttggttggtagtgcccg  
gtttcgaaccggggacctttcgcgtggttaggcgaacgtgataaccactacactacggaaaccaacgggtgctagACGCGTattgtctatt  
ctgactcggatcCGTACGaatctctatggtttgacagcttatacctgattagcttggagcgaagccagcaatggtagaggggaagattct  
gcacgtcccttccagggcggcctccccgtcaccaccccccaaccgccccgacccggagctgagagtaattcatacaaaaggactcggc  
cctgccttggggaaaccagggacgctcgttaaactcccactaacgtagaaccagagatcgtcgcgttccccccccctcaccgcccg  
ctctcgtcatcactgaggtggagaagagcattcgtgaggtccgggtgcccgtcagtgggcagagcgcacacogcccacagtcocccgaga  
agttggggggaggggtcggcaattgaaccgggtgcctagagaaagtggcgcggggtaaactgggaaagtgatgtcgtgtactggctccgc  
cttttccccgaggggtgggggagaaaccgtatataaagtgcagtagtcgcgctgaacgttcttttccgcaaccgggttggcgcagaaaca  
ggtaagtgcgctgtgtggttccccgcccctggcctctttacgggttatggcccttgcgctgacctgaattacttccacgccccctggctg  
cagtagctgattcttgatccccgagcttccgggttggaaagtgggtgggagagttcgaggccttgcgcttaaggagccccctcgcctcgtgc  
ttgagttgaggcctggcctgggcgctggggcgcgcgctgcgaatctgggtggcacccttcgcgctgctctcgtgcttctcgataagctct  
tagccatttaaaattttgatgacctgctgcgacgcttttttctggcaagatagctcttgtaaagtgcggggccaagatctgcacactggt  
atctcgggttttggggcgcggggcggcgacggggcccgtgctcccagcacaatgctcggcgagggcggggcctgcgagcgcggcggc  
gagaaatcggacgggggtagctcaagctggcggcctgctctgggtgctggcctcgcgcgcccgtgtaacgccccgcccggggcaca  
caggtcggcccgttcggcaccagttgctgtagcgggaaagatggcgccttccccgcccctgctcaggtagcctcaaaaaggagcgcggc  
gctcgggagagcggggcgggtgagtcaccacacaaaggaaaaggccttccgctcctcagcgcctcctcatgtgactccacggagtac  
cgggcgcgctccagccacctcgattagttctcagacttggagtagctcgtcttttaggttggggggaggggttttatgcgagtgagtt  
tccccacactgagtggtggagactgaagtttagccagcttggcacttgatgtaattctccttggaaatttgcctttttgagtttggat  
cttggttcattctcaagcctcagacagtggttcaaaagttttttcttccatttcagggtgctgtaaaaactctagcgttccgctctaga  
actagctcaGCTAGCGCTACCGGTCGCCACCatgggtgagcaaggggcagggagctggttaccgggggtggtgcccactcctggtcagactgg  
acggcgacgtaaacggccacaagttcagcgtgctcgggcgagggcgagggcgatgccacctacggcaagctgacctgaagttcatctgc  
accaccggcaagctgcccgtgcccctggcccaccctcgtgaccaccctgacctacggcgtgagctgcttcagcgcctaccccgaccacat  
gaagcagcagcacttctcaagtcgcctatgcccgaaaggctacgtccaggagcgcaccaatcttctcaaggacgacggcaactacaaga  
cccgcgcgaggtgaagttcaggggcgacaccctgggtgaaccgcatcgagctgaagggaatcgacttcaaggaggacggcaacatcctg  
gggcacaagctggagtagaactacaacagccacaacgctctataatcagggcgaacagcagaagaacggcatcaaggtgaacttcaagat  
ccgccacaacatcgaggacggcagcgtgcagctcgcgcgaccactaccagcagaacacccccatcggcgacggccccctgctgctgccc  
acaaccactacctgagcaccagctccgcccctgagcaaaagacccccacgagaagcgcgatcacatggtcctgctggagttcgtgaccgcc  
gcccggatcactctcggcatggacgagctgtacaagGTcactCggtGTgaaaacctgtacttccaaggtatgggtgagcaaggggcagga  
gctgttaccgggggtggtgcccactcctggtcagctggacggcgagctaaacggccacaagttcagcgtgctcgggcgagggcgagggcg  
atgccacctacggcaagctgacctgaagttcatctgcaccaccggcaagctgcccgtgcccctggcccaccctcgtgaccaccctgacc  
tacggcctgagctgcttcagcgcctaccccagccacaatgaagcagcagacttctcaagtcgcctaccccgaaggctacgtccagga  
gcgacactcttctcaaggacgagcggcaactacaagccccgcgaggtgaagttcaggggcgacaccctgggtgaaccgcatcgagc  
tgaagggaatcgacttcaaggaggacggcaacatctcggggcacaagctgggagtagaactacaacagccacaacgctctataatcagggc  
gacaagcagaagaacggcatcaaggtgaacttcaagatccgccacaacatcgaggacggcagcgtgcagctcgcgcgaccactaccagca  
gaacacccccatcggcgacggccccctgctgctgcccgacaaccactacctgagcaccagctccgcccctgagcaaaagacccccacgaga  
agcgcgatcacatggtcctgctggagttcgtgaccgcccgggacactctcggcatggacgagctgtacaagACcactGcgtGgaa

aacctgtacttccaa**ggtatggtgagcaagggcgaggagctgttcaaccgggtggtgcccacctctggtcgagctggacggcgacgtaaa**  
**cgcccaacagttcagcgtgtccggcgagggcgagggcgatgccacctacggcaagctgacctgaagttcactctgcaccaccggcaagc**  
**tgcccggtgccctggccaccctcgtgaccaccctgacctacggcgtgacgtgcttcagccgctaccccgaccacatgaagcagcagcagc**  
**ttcttcaagtcgccatgccgaaggctacgtccaggagcgcaccatcttcttcaaggacgacggcaactacaagaccgcgcgaggt**  
**gaagttcgagggcgacaccctggtgaaccgcatcgagctgaagggcatcgacttcaaggaggacggcaacatcctggggcacaagctgg**  
**agtacaactacaacagccacaacgtctatatcatggccgacaagcagaagaacggcatcaaggtgaacttcaagatccgccacaacatc**  
**gaggacggcagcgtgacgtcgcgaccactaccagcagaacacccccatcggcgacggccccgtgctgctgcccgacaaccactacct**  
**gagcaccagtcgcctgagcaaaagacccaacgagaagcgcgatcacaatggtcctgctggagttcgtgaccgcgcgcccggatcactc**  
**tcggcatggacgagctgtacaag**GTcactAcgtgT**gaaaacctgtacttccaa**ggtatggtgagcaagggcgaggagctgttcaaccggg****  
**gtggtgcccacctctggtcgagctggacggcgacgtaaacggccacaagttcagcgtgtccggcgagggcgagggcgatgccacctacgg**  
**caagctgacctgaagttcactctgcaccaccggcaagcttccctggtccccaccctcgtgaccaccctacgacctacggcgtgacgt**  
**gcttcagccgctaccccgaccacatgaagcagcagacttcttcaagtcgcgacatgcccgaaggtcagctccaggagcgcaccatcttc**  
**tcaaggcagcggcaactacaagaccgcgcgaggtgaagttcgagggcgacaccctgggtgaaccgcatcgagctgaagggcatcga**  
**cttcaaggaggacggcaacatcctggggcacaagctggagtaacaactacaacagccacaacgtctatatcatggccgacaagcagaaga**  
**acggcatcaaggtgaacttcaagatccgccacaacatcgaggacggcagcgtgacgtcgcgaccactaccagcagaacacccccatc**  
**ggcgacggccccgtgctgctgcccgacaaccactacctgagcaccagtcgcctgagcaaaagacccaacgagaagcgcgatcacaat**  
**ggtcctgctggagttcgtgaccgcgcgcccggatcactctcggcatggacgagctgtacaag**ACcactTcgtgCg**aaaacctgtacttcc**  
**aa**ggtatggtgagcaagggcgaggagctgttcaaccgggtggtgcccacctctggtcgagctggacggcgacgtaaacggccacaagttc****  
**agcgtgtccggcgagggcgagggcgatgccacctacggcaagctgacctgaagttcactctgcaccaccggcaagctgcccgtgccctg**  
**gcccaccctcgtgaccaccctgacctacggcgtgacgtgcttcagccgctaccccgaccacatgaagcagcagcagcttcttcaagtcgc**  
**ccatgcccgaaggtacgtccaggagcgcaccatcttcttcaaggacgacggcaactacaagaccgcgcgaggtgaagttcgagggc**  
**gacaccctggtgaaccgcatcgagctgaagggcatcgacttcaaggaggacggcaacatcctggggcacaagctggagtaacaactaca**  
**cagccacaacgtctatatcatggccgacaagcagaagaacggcatcaaggtgaacttcaagatccgccacaacatcgaggacggcagc**  
**tgagctcgcgaccactaccagcagaacacccccatcggcgacggccccgtgctgctgcccgacaaccactacctgagcaccagtc**  
**gcccgtgagcaaaagacccaacgagaagcgcgatcacaatggtcctgctggagttcgtgaccgcgcgcccggatcactctcggcatggacga**  
**gctgtacaag**gaaaacctgtacttccaa**Ag**ggaga**AAGCTT**gtttaagggaccacgtgattacaacccgatacagagcaccatttgtc****  
**atttgacgaatgaatctgatgggcacacaacatcgtttgatgggtattggatttgggtcccttcactattacaacaagcacttgtttaga**  
**agaaataatggaaactatttgggtccaatcactacatgggtgattcaaggtcaagaacaccacgacttggcaacaacacctcattgatgg**  
**gagggacatgataaattttcgcataaggtattcccaccatttctcaaaagctgaaatttagagagccacaagaaggaagggcagcga**  
**tatgtcttgacacaaccaacttccaactaagagcattctagcatgggtgcagacactagttgcacattcccttcacttgaaggcata**  
**ttctggaagcattggattcaaaccaaggaaggcagctggcagctccatttagtatacaactagagatgggttcaattgttgggtatatacact**  
**agcatcgaatttccacaacacaacaattatttcaacagcgtgcccgaaaaacttcaatggaaattgttgacaaaacagggagcgcagcag**  
**gggttagtgggtggcgattaaatgctgactcagatatttggggggccataaagtttctatgagcaaacctgaagagccttttcagcca**  
**gttaaggaagcagactcaactcatgaaatgaattggtgtactcgaagaaaacctgtacttccaa**agtATGCATAGATCA**AC**GAGATATCAG****  
**CCATGGCTTCCC GCCCGGGCGGTGGCGGGCGCAGGATGATGGCACGCTGCCCATGTCTTGTGCCAGGAGAGCGGGATGGACCGTCAACCCTG**  
**CAGCCTGTGCTTCTGCTAGGATCAATGTGGAGCTCGTGCACCTGACTCCTGAGGAGAAGTCTGCCGTTACTGCCCTGTGGGGCAAGGTG**  
**AACGTGGAT**GAAGTTGGTGGT**GAGGCCCT**GGGCAGGCTGCTGGTGGTGGTCTACCCTTGGACCTTAGAGGTTCTTTGAGTCTCTTTGGGGATCT****  
**GTCCACTCCTGATGCTGTTATGGGCAACCCTAAGGTGAAGGCTCATGGCAAGAAAGTGCTCGGTGCCTTTAGTGATGGCCTGGCTCACC**  
**TGGACAACCTCAAGGGCACCTTTGCCACACTGAGTGAGCTGCACTGTGACAAGCTGCACGTGGATCCTGAGAAGTT**CAGGGT**GAGTCTA**  
**TGGGACCCTTGATGTTTTCTTTCCCTTCTTTTCTATGGTTAAGTTCATGTGCATAGGAAGGGGATAAGTAACAGGGTACAGTTTTAGAAT**  
**GGGAAACAGACGAATGATTGCATCAGTGTGGAAGTCTCAGGATCGTTTTAGTTTTCTTTATTTGCTGTTTATAACAATGTTTTCTTTT**  
**GTTTAATTCTTGCTTTCTTTTTTTTTCTTCTCCGCAATTTTTACTATTATACTTAATGCCTTAACATTGTGTATAACAAAAGGAAATAT**  
**CTCTGAGATACATTAAGTAACTTAAAAAAAACCTTTACACAGTCTGCCTAGTACATTACTATTTGGAATATATGTGTGCTTATTTGCA**  
**TATTCATAATCTCCCTACTTTATTTTCTTTTATTTTTAATTGATACATAATCATTATACATATTTATGGGTAAAGTGTAAATGTTTTAA**  
**TATGTGTACACATATTGACCAAATCAGGGTAATTTGCATTTGTAATTTTAAAAAATGCTTCTTCTTTAATATACTTTTTTGTTTAT**  
**CTTATTTCTAATACTTTCCCTAATCTCTTTCTTTCCAGGGCAATAATGATACAATGTATCATGCCTCTTTGCACCATTCTAAAGAATAAC**  
**AGTGATAATTTCTGGGTTAAGGCAATAGCAATATTTCTGCATATAAATTTCTGCATATAAATTTGTAACATATAAAGGTTTACATA**  
**TTGCTAATAGCAGCTACAATCCAGCTACCAATTTCTTTTTATTTTTATGGTTGGGATAAAGGCTGGATTATTCTGAGT**CCAAGT**TAGGCC**  
**TTTTGCTAATCATGTTTATACTCTTATCTTCTCCACAGCTCCTGGGCAACGTGCTGGTCTGTGTGCTGGCCATCACTTTGGCAAA**  
**GAATTCACCCACCAGTGCAGGCTGCCTATCAGAAAGTGGTGGCTGGTGTGGCTAATGCCCTGGCCACAAGTATCAC**TAA**GC**GGCCGC****  
**TCGCTTTCTTGCTGTCCAATTTCTATTAAAGGTTCCCTTTGTTCCCTAAGTCCAACTACTAAACTGGGGGATATTATGAAGGGCTCGAG**  
**GC**TGATCA****GCCTCGACTGTGCCTTCTAG**TTGCCAGCCATCTGTTGTTTGGCCCTCCCCCGTGCCTTCTTTGACCCTGGAAGGTGCCACT**  
**CCCCTGTCTTTTCTAATAAAAATGAGGAAATGCATCGCATTGTCTGAGTAGGTGTCACTTCTATTCTGGGGGTGGGGTGGGGCAGGA**  
**CAGCAAGGGGGAGGATTGGGAAGACAATAGCAGGCATGCTGGGGATGCGGTGGGCTCTATGGCTTCTGAGGCGGAAAGAACCAGCTGGG**  
**GCTCTAGGGGGTATCCCCACGCGCCCTGTAGCGGCGCATTAAAGCGCGGCGGGTGTGGTGGTTACGCGCAGCGTGACCGCTACACTTGCC**  
**AGCGCCCTAGCGCCCGCTCCTTTTCGCTTTCTTCCCTTCTTTCTCGCCACGTTTCGCCGGCTTTCCCCGTCAAGCTCTAAATCGGGGGCT**  
**CCCTTAGGGTTCCGATTTAGTGCTTTACGGCACCTCGACCCAAAAAAGTTGATTAGGGTGATGGTTACGTAGGTAC**G**ctagcaccg**  
**ttggttccgtagtgtagtggttatcacgttcgcctaacacgcgaaaggtccccggttcgaaacggggcactacaacaacaacagctG**  
**GTACCCTAGAAAGTTCTATTCCGAAGTTCTATT**CTTAGAAAGTATAGGAAGTT**CTTTGGCCAAAAAGCCTGAAAgatcacgagata**  
**tcagccatggcttcccgcggcggtggcggcgaggatgatggcacgctgccc**C**gtcttgtgccaggagagcggga**C**ggaccgtcac**  
**cctgcagcctgtgcttctgctaggatcaatgtg**gaaaacctgtacttccaa**G**gtaccgagtacaagcccacggtgcgctcgcaccgcg****  
**cgacgagctcccagggcgt**C**gcaccctcgcgcgcgcttcgccgactaccccgccacgcgccacacgctcgatccggaccgccaca**  
**tcgagcgggtcaccgagct**gcaagaactcttccacgcgc**gtcgggctcgacatcggcaaggtgtgggtcgcggaagcagggcgccgcg**

gtggcgggtctggaccacgcccggagagcgtcgaagcgggggcggtgttcgccgagatcgccccgcgcattggccgagttgagcgggtcccg  
gctggccgcgcagcaacagatggaaggcctcctggcgcgcaccggcccaaggagcccgcgtggttcctggccaccgtcggcgtctcgc  
ccgaccaccagggcaagggtctgggcagcgcctcgtgctccccggagtggaggcggccgagcgcgcgggggtgcccgcttcctggag  
acctccgcgccccgcaacctccccctctacgagcggctcggcttcaccgtcaccgcccgcgcgtcgaggtgccgaaggaccgcgcacactg  
**gtg**catgaccgcgaagcccgggtgcct**tga**ggtagcctcgcctgatcagcctcgactgtgccttctagttgccagccatctggttgttggc  
cctcccccgctgccttccttgaccctggaagggtgccactcccactgtcctttcctaataaaatgaggaaattgcatcgcattgtctgagt  
agggtgtcattctattctgggggggtgggggtggggcaggacagcaagggggaggattgggaagacaatagcaggcatgctgggga**GTCGAC**  
agggtggcacttttcggggaaatgtgcgcggaaccctatattgtttatattttctaaatacattcaaatatgtatccgctcatgagacaat  
aacctgataaatgcttcaataatattgaaaaaggaagagtatgagtattcaacatttcctgtgtcgccttattcccttttttggcgca  
ttttgccttcctgtttttgctcaccagaaaacgctgggtgaaagtaaaagatgctgaagatcagttgggtgcacgagtggttacatcga  
actggatctcaacagcggtaagatccttgagagttttcgccccgaagaacgttttccaatgatgagcacttttaagttctgctatgtg  
gcgcggtattatcccgtattgacgcggggcaagagcaactcggctcgcgcatacactattctcagaatgacttgggtgagtactacca  
gtcacagaaaagcatcttacggatggcatgacagtaagagaattatgcagtgtgcccataaccatgagtgataaacactgcccgaactt  
acttctgacaacgatcggaggaccgaaggagctaaccgcttttttgcacaacatgggggatcatgtaactcgccttgatcgttgggaac  
cggagctgaatgaagccataccaaacgacgagcgtgacaccacgatgcctgtagcaatggcaacaacgttgcgcaaacctattaactggc  
gaactacttactctagcttcccggcaacaattaatagactggatggaggcggataaaagttgcaggaccacttctgcgctcg**gccttcc**  
**ggc**tggctggtttattgctgataaatctggagcgggtgagcgtg**ggctc**gcggtatcattgcagcactggggccagatggtaagcct  
cccgtatcgtagttatctacacgacggggagtcaggcaactatggatgaaacgaaatagacagatcgcctgagataggtgcctcactgatt  
aagcattggtaactgtcagaccaagtttactcatatatacttttagattgatttaa
